# Supplementary material for: Phenylboronic acid derivative-modified (6,5) single-wall carbon nanotube probes for detecting glucose and hydrogen peroxide
Source: Royal Society of Chemistry journal article supplement (doi:10.1039/c8ra09272a), 2019-01-01

## Supporting Information

### Determination of SWCNT(6,5) Concentration

We use the absorption wavelength of the absorption spectrum to determine the concentration of the purified SWCNT(6,5). Several different concentrations of carbon nanotube in 1%wt SDS dispersions were used to characterized by UV/Vis/NIR spectra. 560nm wavelength peak was chosen as the standard for concentration measurement because it is  $E_{22}$  wavelength of SWCNT(6,5).

Figure S1. Linear plots of the concentration of the SWCNTs (6,5) absorbance at 560nm wavelength peak. The linear fitting equation is  $y=33.488x+0.0005$ . ( $R^2 = 0.99$ )

**Table S1. Library of phenylboronic acid**

| Phenylboronic acid derivative       | Structure                                                                            |
|-------------------------------------|--------------------------------------------------------------------------------------|
| Phenylboronic acid(PBA)             | 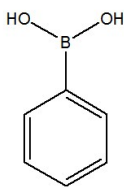  |
| 3-nitrophenylboronic acid(3NPBA)    |  |
| 4-nitrophenylboronic acid(4NPBA)    |  |
| 2-carboxybenzeneboronic acid(2CPBA) |  |

|                                                 |                                                                                      |
|-------------------------------------------------|--------------------------------------------------------------------------------------|
| 3-carboxybenzeneboronic acid(3CPBA)             | 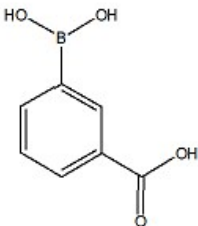   |
| 4-carboxybenzeneboronic acid(4CPBA)             |    |
| 3-aminophenylboronic acid(3AMBA)                |   |
| 3-carboxy-5-fluorobenzeneboronic acid(5F3CPBA)  |  |
| 3-carboxy-5-nitrophenylboronic acid(5N3CPBA)    |  |
| 5-carboxy-2-chlorobenzen boronic acid(2Cl5CPBA) |  |

|                                                |                                                                                      |
|------------------------------------------------|--------------------------------------------------------------------------------------|
| 3-amino-4-methylbenzeneboronic acid(3A4MPBA)   | 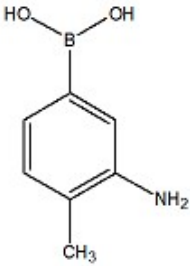   |
| 4-carboxy-3-fluorophenylboronic acid (4C3FPBA) |    |
| 9-anthraceneboronic acid(9ANBA)                |   |
| 9-phenanthreneboronic acid(9PHBA)              |  |
| 4-methyl-1-naphthaleneboronic acid(4M1NPBA)    |  |
| 4-chlorophenyl boronic acid(4CYBA)             |  |

3-acetylphenylboronic acid(3ACPBA)

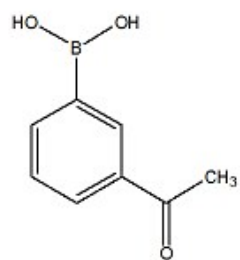

Supplement: c8ra09272a1.pdf [file c8ra09272a1.pdf]
